1  
2  
3  
4  
5  
6  
7  
8  
9  
10  
11  
12  
13  
14  
15  
16  
17  
18  
19  
20  
21

# **Time to death and its predictors among neonates with perinatal asphyxia at a tertiary hospital in southern Ethiopia**

Jenenu Getu Bekele<sup>1\*</sup>, Niguse Mekonnen Kara<sup>2</sup>, Amene Abebe Kerbo<sup>3</sup>, Tadiwos Utalo Urkashe<sup>2</sup>

1-Department of Epidemiology and Biostatistics, College of Health Sciences and Medicine, Wolaita Sodo University, Sodo, Ethiopia

2-Department of Reproductive Health, College of Health Sciences and Medicine, Wolaita Sodo University, Sodo, Ethiopia

3-School of Public Health, College of Health Sciences and Medicine, Wolaita Sodo University, Sodo, Ethiopia

\* Corresponding author

E-mail: [jenenug@gmail.com](mailto:jenenug@gmail.com) (JG)

## 22 Abstract

23 **Background:** Perinatal asphyxia (PNA) remains a leading, yet preventable, cause of neonatal death,  
24 disproportionately affecting low-resource settings like Ethiopia. Despite its significance, data on the  
25 burden and factors influencing survival among asphyxiated neonates in this region are scarce. This study  
26 aims to address this gap by investigating the time to death and its associated predictors in this vulnerable  
27 population.

28 **Methods:** A retrospective cohort study was conducted at Wolaita Sodo University Comprehensive  
29 Specialized Hospital's Neonatal Intensive Care Unit (NICU) in southern Ethiopia. Medical records of 404  
30 neonates diagnosed with PNA between January 2019 and December 2023 were reviewed. The study  
31 followed these neonates for a total of 2889 person-days to assess their survival outcomes. Kaplan-Meier  
32 analysis estimated the median time to death, and a Weibull regression model identified independent  
33 predictors of mortality.

34 **Results:** The findings revealed the incidence density of PNA-related mortality of 30.8 per 1,000 person-  
35 days (95% CI: 25.0-37.9). Notably, nearly 72% of deaths occurred within the first critical week of life,  
36 with a median survival time of 20 days. The multivariable Weibull regression analysis identified several  
37 factors significantly associated with shorter time to death at  $p < 0.05$ . These are presence of meconium-  
38 stained amniotic fluid (MSAF), low fifth-minute Apgar score (less than 7), birth weight greater than  
39 4000gm, low admission oxygen saturation level, treatment with anticonvulsant, the use of Continuous  
40 Positive Airway Pressure (CPAP) for oxygen administration, and need for resuscitation with chest  
41 compression.

42 **Conclusion:** This study highlights the significant burden of PNA-related mortality, particularly during the  
43 first week of life, in a resource-limited setting. The findings underscore the urgent need for improved  
44 PNA management strategies. Furthermore, specific treatment decisions, including the use of  
45 anticonvulsants, oxygen therapy methods, and resuscitation techniques, emerged as crucial factors  
46 influencing survival outcomes. These results call for further investigation into these specific interventions  
47 and potentially revising PNA management protocols to optimize the chances of survival for asphyxiated  
48 neonates in low-resource settings like Ethiopia.

49

50

## 51 **Introduction**

52 Perinatal asphyxia (PNA) is a public health problem and it is responsible for 30%–35% of neonatal deaths  
53 worldwide. The World Health Organization (WHO) defines PNA as the failure to initiate and sustain  
54 breathing at birth. It can happen when the intrauterine (placental gas exchange) or immediately after birth  
55 (pulmonary gas exchange) is compromised or ceased all together. This causes partial or complete lack of  
56 oxygen to the vital organs of the neonate which eventually leads to asphyxia. Neonatal hypoxic-ischemic  
57 encephalopathy (HIE) refers to the neurologic consequences of perinatal asphyxia which is an important  
58 cause of permanent damage to CNS cells which intern results in neonatal death, cerebral palsy, and  
59 mental deficiency [1-5].

60 The majority cases of PNA occur during the labor and delivery process, although up to 20% can occur  
61 during pregnancy and in the early post-natal period. It may result from different causes such as; maternal  
62 hemodynamic compromise due to hemorrhage, amniotic fluid embolism; placental events (acute  
63 abruption), uterine events (rupture), cord events (tight nuchal cord, cord prolapse) and intrapartum  
64 infection (chorioamnionitis). Therefore, early diagnosis and prompt management of these complications  
65 in the delivery room is a crucial step in the prevention of late sequels of PNA [6-8].

66 Neonatal period which is the first 28 days of life is among the most vulnerable periods of life and requires  
67 intensified quality intrapartum and newborn care. Globally 2.4 million children died in this period in  
68 2020. There are approximately 6700 newborn deaths every day, which is equal to 47% of all child deaths  
69 under the age of 5 years. To avert this tragic loss of neonates, the United Nations (UN) through its  
70 Sustainable Development Goal (SDG) goal-three aims to reduce neonatal mortality to at least as low as 12  
71 deaths per 1,000 live births by 2030. But many developing countries seem far from achieving the target  
72 [8-10].

73 Globally, PNA accounts for an estimated 900,000 deaths each year and is one of the primary causes of  
74 early neonatal mortality. Of those infants affected by PNA, 15-20% dies in the neonatal period, and up to  
75 25% of the survivors are left with permanent neurologic deficits. Among the survivors of severe PNA,  
76 majority will leave with some form of handicap such as cerebral palsy, developmental delay, visual and  
77 hearing impairment, and learning and behavioral problems. Therefore, apart from studying neonatal  
78 mortality due to PNA, it is important to study the survival status and short and long term effects of the  
79 condition [2, 11, 12].

80 The exact magnitude of perinatal asphyxia in low and middle-income countries is not known since more  
81 than 60% of births take place outside facilities. But it is evident that intrapartum related neonatal death

82 (birth asphyxia) is a leading cause of neonatal mortality in low-income countries largely due to poverty,  
83 large family size, and cultural beliefs. Neonatal mortality is an indication of the economic status of a  
84 country. The incidence of perinatal asphyxia is 2/ 1000 births in developed countries, but the rate is up to  
85 10 times higher in developing countries where there is limited access to maternal and neonatal care  
86 services [8, 13, 14].

87 In 2021, Ethiopia was ranked fourth among the top ten countries in the world with the highest neonatal  
88 mortality, having 97,000 neonatal deaths with a neonatal mortality rate of 33 deaths per 1000 live births  
89 (LBs). The commonest causes of neonatal deaths are preterm birth, perinatal asphyxia, and infections.  
90 Ethiopia's health sector transformation plan II has set a goal of lowering the neonatal mortality rate to 21  
91 per 1000 LBs by 2025 from the current level. PNA is one of the leading causes of neonatal mortality in  
92 Ethiopia which accounts for 34% of neonatal mortality [9, 15-17]

93 While PNA is a recognized issue, comprehensive data on its impact in Ethiopia at a national level remains  
94 elusive. Existing studies primarily focus on specific healthcare facilities, resulting in a wide range of  
95 estimated PNA-related deaths. For example, the incidence of mortality due to asphyxia is 29, 53, and 100  
96 per 1000 person days in Jimma Medical Center, Dessie Comprehensive Hospital, and public hospitals of  
97 Addis Ababa respectively but, it is only 9.1 deaths per 1000 person days in health facilities found in South  
98 West Ethiopia (18-21). There is also a disparity among the studies done in Ethiopia on the median  
99 survival time after perinatal asphyxia. According to a prospective cohort study done in Southern Ethiopia,  
100 the median survival time was 6.5 days. Which is much lower as compared with studies done in Jimma,  
101 Addis Ababa, and Dessie, where the median survival time is 20, 10, and 8 days respectively (18-20, 22).  
102 According to most studies predictors of survival status of asphyxiated neonates can be classified into  
103 sociodemographic, obstetric, neonatal characteristics, clinical, laboratory, and management predictors  
104 [18-22].

105 Despite different initiatives and strategies that have been implemented to prevent neonatal death, it is still  
106 high and not reduced as expected in developing countries including Ethiopia. Although several studies  
107 were made in Ethiopia on neonatal mortality in general and perinatal asphyxia in particular, most focus on  
108 rate, and little has been done on the time to death and its predictors.

109 Identifying local risk factors and their influence on time to death can inform targeted interventions and  
110 improve overall neonatal survival rates in Ethiopia. Therefore, this study aims to address the knowledge  
111 gap by investigating the following study questions: What is the incidence of neonatal mortality due to  
112 perinatal asphyxia at WSUCSH? What is the time to death among asphyxiated neonates admitted to  
113 WSUCSH? What are the clinical and sociodemographic factors associated with time to death in this

114 population? By addressing these questions, this study will contribute valuable insights into the local  
115 context of perinatal asphyxia and neonatal mortality in Southern Ethiopia. The findings can guide  
116 healthcare professionals in identifying high-risk neonates and implementing appropriate interventions to  
117 improve their chances of survival.

118

## 119 **Methods**

### 120 **Study setting, period, and design**

121 The study was conducted in Wolaita Sodo University Comprehensive specialized Hospital (WSUCSH).  
122 The hospital is found in Wolaita Sodo Town which is found 360km far from Addis Ababa in the South-  
123 West direction. The hospital serves over 2 million catchment population and over 90,000 people visit the  
124 outpatient department per year. Neonatal Intensive Care Unit (NICU) is a separate unit in the pediatrics  
125 department that started service in December 2014 and it has 30 beds. According to last year's facility  
126 report there was a total of 1444 neonatal admissions out of which 136 of them were PNA cases. One  
127 hundred fifty-four neonatal deaths were reported in the same year due to all causes among the total NICU  
128 admissions (unpublished data found from the department).

129 Institutional based retrospective cohort study was conducted. We reviewed the medical records of patients  
130 who were admitted to the NICU of WSUCSH over a five years period from January 2019- December  
131 2023. The data collection was carried out from January 01-31, 2024.

### 132 **Study population**

133 The source population was all neonates who were admitted with the diagnosis of PNA from January  
134 2019- December 2023 and the study population was all randomly selected medical records of PNA  
135 patients who were admitted to the NICU of WSUCSH. Records of neonates whose admission date,  
136 discharge date, and outcome were not recorded on the chart and those who had major congenital  
137 anomalies were excluded from the study.

### 138 **Sample size determination and sampling technique**

139 The sample size was calculated to check the adequacy of the sample size used for a survival sample size  
140 calculation power approach with Cox proportional hazard assumption. By using the Schoenfeld formula  
141 [23] and considering the following assumptions: Significance level ( $\alpha$ ) = 0.05, Power 80% ( $\beta$ ) = 0.8,

142 proportion of variability among covariates of interest (SD) = 0.5, Square of correlation of independent  
143 variables with time to death ( $R^2$ ) = 0.5 and by taking cord prolapse, vaginal mode of delivery, stage-III  
144 HIE, sepsis, and AKI as the common predictive variables [20,22,24,25], the sample size was calculated  
145 using Stata version 14.2 statistical software as shown in **Table 1**.

146 Table 1 Sample size calculation for the study of the predictors of the time to death among PNA patients  
147 who were admitted to NICU of WSUCSH; 2024

| Variables                | Probability of events | Probability of withdrawals | Effect size (CHR) | Sample size (n) | Author &(study area)             |
|--------------------------|-----------------------|----------------------------|-------------------|-----------------|----------------------------------|
| Cord prolapse            | 7.85%                 | 10%                        | 13.68             | 130             | Dessu et al. (Southern Eth) [22] |
| Stage-III HIE            | 32.79                 | 10%                        | 2.06              | <b>408</b>      | Daka et al. (West Oromia) [24]   |
| Acute kidney injury      | 22.52%                | 10%                        | 2.95              | 265             | Lencho K. et al. (Jimma) [20]    |
| Vaginal mode of delivery | 54.08%                | 5.9%                       | 2.91              | 109             | Kebede BF et al. (SW-Eth) [25]   |
| Sepsis                   | 54.08%                | 5.9%                       | 0.48              | 230             | Kebede BF et al. (SW-Eth) [25]   |

148 Therefore, the sample size obtained from stage-III HIE (n=408) was considered as the final sample size  
149 for the study because it gives a maximum sample size. Computer generated simple random sampling  
150 method was employed to select medical record numbers of the study participants.

## 151 **Study variables**

152 **The dependent variable** is time to death among neonates who were admitted with the diagnosis of PNA.

153 **The independent variables include;** sociodemographic and obstetric characteristics of the mothers of  
154 PNA patients (age, place of residence, parity, duration of labor, duration of rupture of membrane (ROM),  
155 place of delivery, mode of delivery, obstetric complication, etc.), neonatal characteristics (Sex of the  
156 baby, gestational age, birth weight and age at presentation), clinical and laboratory variables (Apgar  
157 score, crying, stage of HIE, vital signs, baseline lab results), treatment related variables (bag &mask  
158 ventilation, chest compression, adrenalin, aminophylline, fluid and electrolyte management, oxygen,  
159 anticonvulsant, antibiotics, and calcium gluconate administration.

160

## 161 **Operational definition**

162 **Event:** in this research the event of interest is death due to PNA

163 **Censored:** are those neonates who are:

- 164 • Discharged improved (has discharge summary record),
- 165 • Left against medical advice (caregivers signature, or clearly stated on the discharge  
166 summary),
- 167 • Those referred to other facilities (has copy of referral form in the medical record)
- 168 • Those still on treatment after 28 days of follow-up.

169 **Death:** neonates who were admitted with a diagnosis of perinatal asphyxia and died from any immediate  
170 cause secondary to asphyxia while in the NICU of the hospital, for which a death summary sheet was  
171 found.

172 **Time to death:** it is a time during which asphyxiated neonates developed the event of interest measured  
173 in days. It is the period from the date of diagnosis of PNA to the date of death.

174 **Perinatal asphyxia:** was considered based on the clinical diagnosis made by a health care provider and  
175 the stage of PNA is also taken as recorded on the medical record of the patient.

176 **Follow-up period:** The starting point for retrospective follow-up was the time of diagnosis of PNA and  
177 the end point was date of death, discharge or 28 days of age after birth. Therefore, the overall follow up  
178 period was 28 days.

## 179 **Data collection tool and procedure**

180 Data was collected using a data abstraction checklist adapted after reviewing different literature, previous  
181 related studies [18-25], the Health Management Information System (HMIS) registration book, standard  
182 NICU referral paper, and PNA follow up chart. The checklist contains four parts; questions related to  
183 socio-demographic and obstetric related factors, neonatal related factors, clinical and laboratory factors,  
184 and management related factors. (See **S3 File** for data abstraction checklist)

## 185 **Data processing and analysis**

186 The collected data using the Kobo collect mobile application was submitted to the central computer  
187 database and checked for completeness and consistency daily. At the end of the data collection period, the  
188 data was exported using excel and SPSS-label syntax command. The data carefully cleaned and coded.

189 Finally, it was exported to Stata version 14.2 (Stata Corp. LP, College Station, Texas) statistical software  
190 for analysis.

191 Incidence density rate of mortality was computed by dividing the total number of events to total follow up  
192 time in person-days. Kaplan Meier survival analysis was used to estimate the cumulative risk of mortality  
193 at a specific point in time and the overall median time to death of the asphyxiated neonates. The log-rank  
194 test was used to assess the statistically significant median time to death difference between categories of  
195 covariates at  $p < 0.05$ .

196 Multicollinearity was assessed between independent variables by using a variance inflation factor (VIF).  
197 In this study the maximum VIF value was 1.654 and the mean VIF was 1.296. Therefore, there was no  
198 multicollinearity among independent variables, and we can make valid interpretation of the results of the  
199 final multivariate regression model.

200 Testing the proportional hazard assumption (PHA) is vital to interpret and to use fitting proportional  
201 hazard models and accept multivariate analysis results. In this study we used the Schoenfeld's residuals  
202 test and log-log plot of survival or test of parallel lines to test the PHA. The Schoenfeld's residuals PHA  
203 test was run for the individual covariates and global test was used after running the final model.  
204 Accordingly, the p-value for the global test is 0.990 ( $X^2=7.02$ ), which is greater than 0.05. Therefore, in  
205 this study the PHA was not violated. Graphical representations of the PHA test for some of the covariates  
206 included in the final regression model are shown in Fig 1.

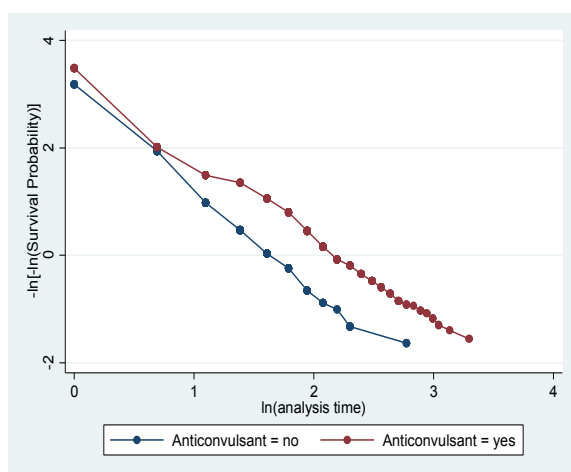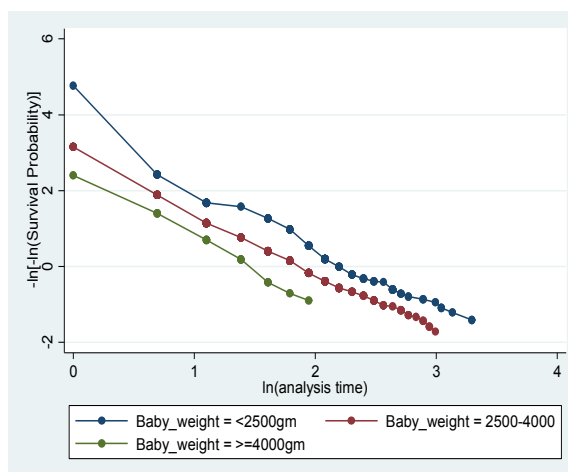



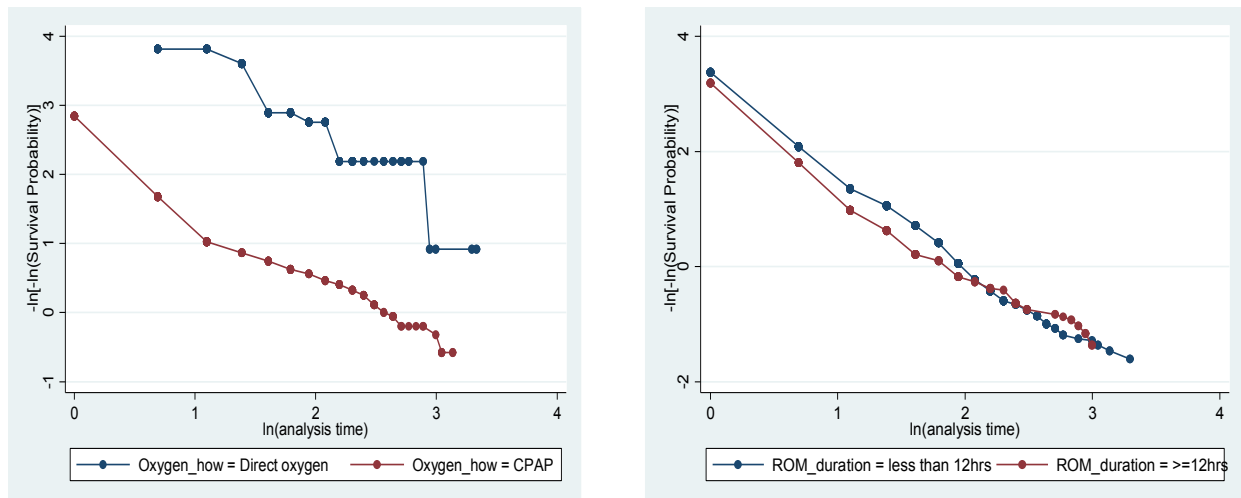

207 **Fig 1. Test of proportional hazard assumption graphically by using test of parallel lines for**  
208 **treatment with anticonvulsant, birth weight, method of oxygen administration, and duration of**  
209 **ROM**

210 Model comparison was made between Cox, Weibull, Exponential, and Gompertz regression models using  
211 Akai's Information Criteria (AIC) and log-likelihood to determine which model was the best fit for the  
212 given data set. The model with the lowest AIC was taken as the best fit. Therefore, as shown on

213 **Table 2** the Weibull regression with an AIC of 280.75 was the model that suited the data.

214

215 Table 2 Summary of model comparison among the semi-parametric (Cox proportional hazard model) and  
216 parametric regression models using AIC, BIC, and Log-likelihood testes

| Model       | AIC    | BIC    | Log-likelihood |
|-------------|--------|--------|----------------|
| Cox         | 538.57 | 601.52 | -251.28        |
| Weibull     | 280.75 | 350.70 | -120.38        |
| Exponential | 287.46 | 353.91 | -124.73        |
| Gompertz    | 285.90 | 355.84 | -122.95        |

217  
218 Cox-Snell residuals test is used to assess the overall goodness of fit of our model. In this study, as seen on  
219 **Fig 2**, the hazard function follows the 45-degree line closer to the baseline. Therefore, it showed that our  
220 multivariate Weibull-regression model is fitted for the analysis and interpretation of our data.

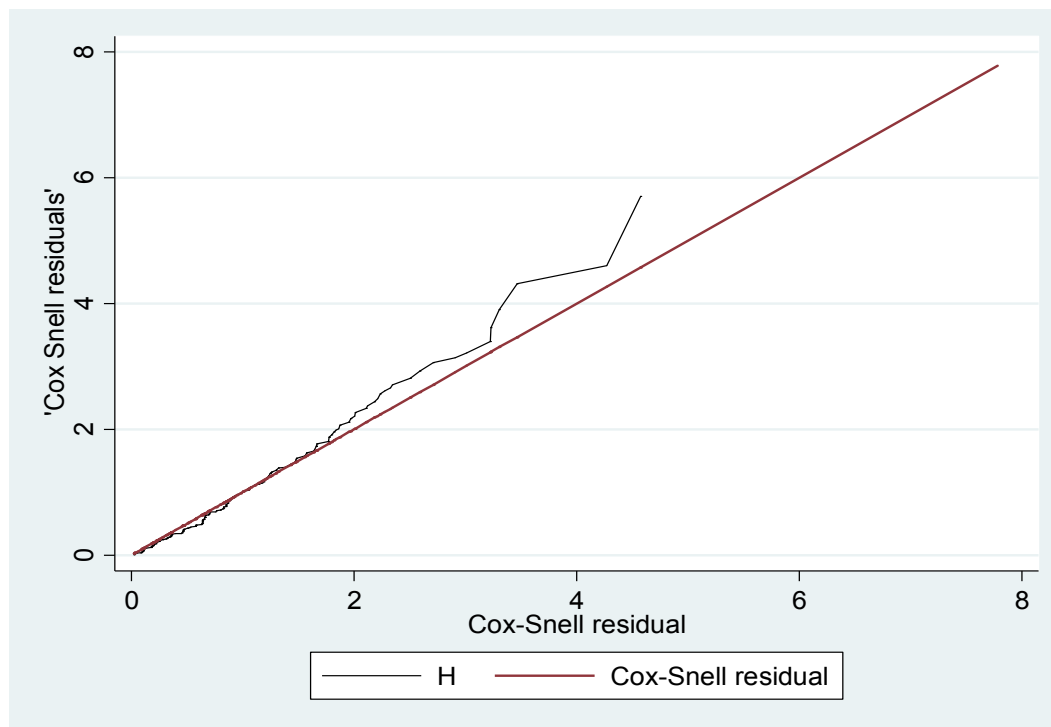

221  
222 **Fig 2. Cox-Snell residuals graph of the final Weibull regression model in the study of the time to**  
223 **death and its predictors among asphyxiated neonates admitted to WSUCSH, Southern Ethiopia;**  
224 **2024**

225 Finally, to identify independent predictors of survival of asphyxiated neonates, Weibull proportional  
226 hazards regression model was used. First Bi-variable Weibull regression model was fitted for each  
227 explanatory variable, then, those variables having a P-value<0.2 in bivariate analysis, non-collinear, and

228 those which doesn't violate the PH assumption were entered in the final multivariate analysis. Hazard  
229 ratio with 95% confidence interval and p-values ( $<0.05$ ) was used to measure the strength of association  
230 and to identify statistically significant predictors.

### 231 **Ethics approval and consent to participate**

232 An ethical clearance letter was obtained from Wolaita Sodo University Collage of Health Sciences and  
233 Medicine (CHSM) institutional review board. Then support letter was obtained from the CHSM and was  
234 submitted to the hospital's chief clinical director office to grant permission to access the medical records  
235 of the study subjects. All information collected from patients' chart were kept under strict confidentiality  
236 and not disclosed to any person other than principal investigator and data collectors. Care was taken not to  
237 include personal identifiers such as names of the participants.

238

## 239 Results

240 Four medical records with incomplete data were excluded from the initial sample of 408, leaving 404  
241 asphyxiated neonates for final analysis. These neonates were followed for a total of 2,889 person-days (a  
242 unit combining the number of patients and the duration of observation). During this period, 89 (22.0%) of  
243 the neonates passed away (event of interest), while the remaining 315 (78.0%) censored. Fig 3 illustrates  
244 the overall outcomes for these neonates.

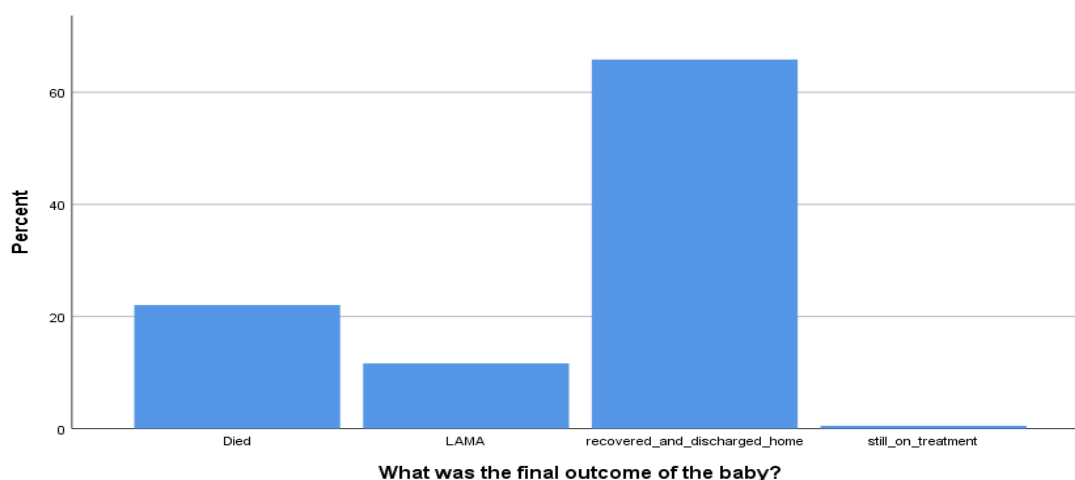

245  
246 **Fig 3. The overall outcomes of asphyxiated neonates who were admitted at the NICU of WSUCSH,**  
247 **Southern Ethiopia; 2024**

## 248 Sociodemographic & obstetric characteristics of mothers of study 249 participants

250  
251 The mothers of the asphyxiated neonates were primarily middle aged adults, with most (80.4%) falling  
252 between 21 and 34 years old (mean age: 26 years, SD: 4.8). A majority (55.7%) resided in rural areas.  
253 Regarding parity, multiparous mothers (those with two or more previous pregnancies) were the most  
254 common group (59.7%). Prenatal care and delivery location showed positive trends. Over 70% of the  
255 mothers had at least one antenatal care (ANC) visit, and a similar proportion delivered at Wolaita Sodo  
256 University Comprehensive Specialized Hospital (WSUCSH) itself (inborn deliveries). The most frequent  
257 delivery mode was spontaneous vertex delivery (SVD) at 47%, followed by cesarean section (C-section)  
258 at 35.1% (Table 3).

259 Table 3 Sociodemographic and obstetrics characteristics of mothers of asphyxiated neonates who were  
260 admitted to WSUCSH, Southern Ethiopia; 2024

| S. No. | Variables                       | Response                                  | Total freq.(percent) | Survival status |                |
|--------|---------------------------------|-------------------------------------------|----------------------|-----------------|----------------|
|        |                                 |                                           |                      | Died (n/%)      | Censored (n/%) |
| 1      | Age of the mother (n=404)       | ≤20 years                                 | 52 (12.9)            | 8(15.4)         | 44(84.6)       |
|        |                                 | 21-34 years                               | 325 (80.4)           | 74(22.8)        | 251(77.2)      |
|        |                                 | ≥35 years                                 | 27 (6.7)             | 7(25.9)         | 20(74.1)       |
| 2      | Residence of the mother (n=404) | Urban                                     | 179(44.3)            | 38(21.2)        | 141(78.8)      |
|        |                                 | Rural                                     | 225(55.7)            | 51(22.7)        | 174(77.3)      |
| 3      | Parity (n=404)                  | Primiparous                               | 163(40.3)            | 32(19.6)        | 131(80.4)      |
|        |                                 | Multiparous                               | 241(59.7)            | 57(23.7)        | 184(76.3)      |
| 4      | ANC follow-up (n=400)           | Yes                                       | 289(71.5)            | 68(23.5)        | 221(76.5)      |
|        |                                 | No                                        | 111(27.5)            | 21(18.9)        | 90(81.1)       |
| 5      | Place of delivery (n=404)       | In born (WSUCSH)                          | 292(72.3)            | 68(23.3)        | 224(76.7)      |
|        |                                 | Out born                                  | 112(27.7)            | 21(18.8)        | 91(81.3)       |
| 6      | Mode of delivery (n=404)        | SVD                                       | 190(47)              | 33(17.4)        | 157(82.6)      |
|        |                                 | Cesarean section                          | 142(35.1)            | 41(28.9)        | 101(71.1)      |
|        |                                 | Instrumental and assisted breach delivery | 72(17.9)             | 15(20.8)        | 57(79.2)       |
| 7      | Duration of labor (n=400)       | Less than 24 hours                        | 337(84.3)            | 74(22.0)        | 263(78.0)      |
|        |                                 | Greater than 24 hours                     | 63(15.7)             | 15(23.8)        | 48(76.2)       |
| 8      | Duration of ROM (n=398)         | Less than 12 hours                        | 299(75.1)            | 58(19.4)        | 241(80.6)      |
|        |                                 | Greater than 12 hours                     | 99(24.9)             | 31(31.3)        | 68(68.7)       |
| 9      | Type of pregnancy (n=404)       | Singleton                                 | 370(91.6)            | 83(22.4)        | 287(77.6)      |
|        |                                 | Twin and above                            | 34(8.4)              | 6(17.6)         | 28(82.4)       |
| 10     | Amniotic fluid (n=367)          | Clear                                     | 103(28.1)            | 4(3.9)          | 99(96.1)       |
|        |                                 | Meconium stained                          | 264(71.9)            | 72(27.3)        | 192(72.7)      |

261

## 262 Neonatal characteristics

263 Slightly over half (56.2%) of the neonates diagnosed with perinatal asphyxia were male. The majority  
264 were born at term gestation (70%) and with normal birth weight (65.1%). The average birth weight was

265 2,959 grams (g) with a SD of 794g. Notably, two-thirds of these babies did not cry immediately after  
 266 delivery, and most (74.2%) had additional comorbidities besides PNA (Table 4).

267 Table 4 Neonatal characteristics of asphyxiated neonates who were admitted to the NICU of WSUCSH,  
 268 Southern Ethiopia; 2024

| S.No. | Variables                                            | Responses               | Total<br>Freq. (%) | Survival status |                   |
|-------|------------------------------------------------------|-------------------------|--------------------|-----------------|-------------------|
|       |                                                      |                         |                    | Died<br>(n/%)   | Censored<br>(n/%) |
| 1     | Sex of the baby (n=404)                              | Male                    | 227(56.2)          | 53(23.3)        | 174(76.7)         |
|       |                                                      | Female                  | 177(43.8)          | 36(20.3)        | 141(79.7)         |
| 2     | Gestational age (n=378)                              | Pre-term (<37wks)       | 81(21.5)           | 13(16.0)        | 68(84.0)          |
|       |                                                      | Term (37-42wks)         | 263(70.0)          | 65(24.7)        | 198(75.3)         |
|       |                                                      | Post-term (>42wks)      | 32(8.5)            | 5(15.6)         | 27(84.4)          |
| 3     | Birth weight (BW) (n=404)                            | Low BW ( $\leq$ 2499g)  | 118(29.2)          | 15(12.7)        | 103(87.3)         |
|       |                                                      | Normal BW (2500-3999g)  | 263(65.1)          | 65(24.7)        | 198(75.3)         |
|       |                                                      | High BW ( $\geq$ 4000g) | 23(5.7)            | 9(39.1)         | 14(60.9)          |
| 4     | Age at admission (n=404)                             | $\leq$ 24hrs            | 368(91.1)          | 79(21.5)        | 289(78.5)         |
|       |                                                      | >24hrs                  | 36(8.9)            | 10(27.8)        | 26(72.2)          |
| 5     | Was the baby cried immediately after birth? (n=370)  | Yes                     | 127(34.3)          | 6(4.7)          | 121(95.3)         |
|       |                                                      | No                      | 243(65.7)          | 73(30.0)        | 170(70)           |
| 6     | Were there other co-morbidities besides PNA? (n=404) | Yes                     | 300(74.2)          | 70(23.3)        | 230(76.7)         |
|       |                                                      | No                      | 104(25.8)          | 19(18.3)        | 85(81.7)          |

269

## 270 Clinical Findings and Management

271 Upon admission, most asphyxiated neonates had low Apgar scores (below 7) at all three measured time  
 272 points (1st, 5th, and 10th minute). Diagnoses included hypoxic-ischemic encephalopathy (HIE) with  
 273 varying severity stages (30% stage I, 47.5% stage II, and 22.5% stage III). During their hospital stay, the  
 274 most frequent complications were hospital-acquired infections (HAIs) (54.3%), seizures (33.3%), and  
 275 hypoglycemia (20.4%) (refer to **S1 Table** for details).

276 Over 76% of the asphyxiated neonates received oropharyngeal suctioning and resuscitation. Resuscitation  
277 methods varied, with 60% requiring only bag-and-mask ventilation, while the remaining 40% needed  
278 advanced techniques like chest compressions, intubation, and adrenaline. Most neonates received oxygen  
279 therapy (88.4%), antibiotics (91.8%), intravenous fluids (94.3%), and anticonvulsants (57.4%) as part of  
280 their PNA management (refer to **S2 Table** for details).

## 281 **Incidence of mortality and median time to death**

282 According to the study, the overall incidence density of mortality was 30.8 per 1000 person days (95%CI:  
283 25.0-37.9). The estimated cumulative proportion of surviving on days 1, 7, 14, and 21 are 0.98, 0.817,  
284 0.648 and 0.39 respectively. Sixty-four (71.91%), of the deaths of the neonates occurred during the first 7  
285 days of follow-up period. The median time to death was 20 days (95% CI: 16.0, 23.9) (Fig 4).

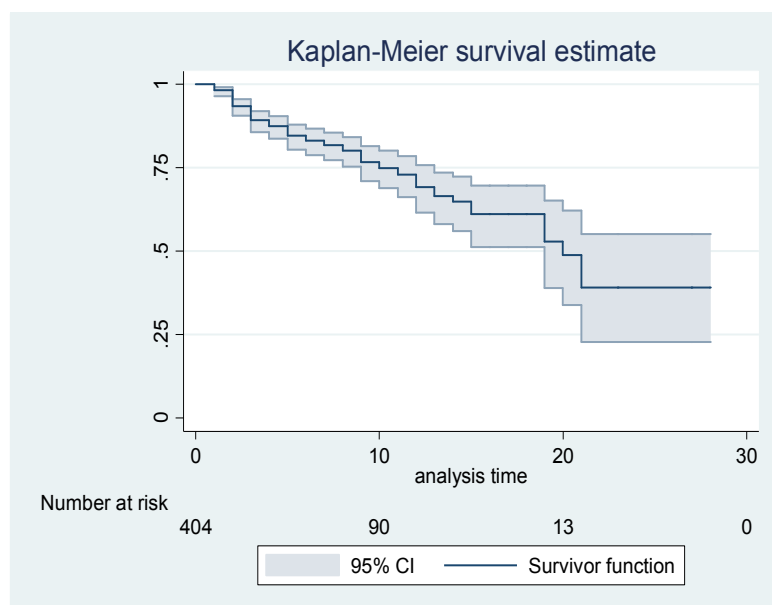

As shown on Fig 4, the overall Kaplan Meier survival curve depicts the probability of survival decreases as the follow up time increases. During the 1<sup>st</sup> day of hospital stay the probability of survival was 98%, and on the 7<sup>th</sup> day it was 81.7%. On the 20<sup>th</sup> follow up day the probability of survival was 50% which is the overall median survival day.

286  
287 **Fig 4. Kaplan Meier survival plot of neonates admitted with perinatal asphyxia to WSUCSH,**  
288 **Southern Ethiopia; 2024**

## 289 **Time to death difference among categories of different covariates**

290 Log-rank test was conducted to assess the existence of any significant difference in survival time among  
291 categories of different explanatory variables. Accordingly, a statistically significant difference in the  
292 survival time among categories of stage of HIE, duration of rupture of membrane (ROM), weight of the  
293 baby, fifth-minute Apgar score, respiratory rate at admission, presence of ANC follow up, condition of  
294 amniotic fluid, mode of delivery, and gestational age at delivery was observed at  $p < 0.05$ . (Fig 5)



295 As shown on Fig 5-A neonates who are delivered after a prolonged duration of rupture of membrane  
296 (ROM) (red line) has lower survival as compared with those with normal duration of ROM (blue line) and  
297 the difference is statistically significant at  $p < 0.05$ . Similarly, those neonates with fifth-minute Apgar  
298 score of greater than 7 (Fig 5-B (red line) has a better survival as compared with those who has Apgar  
299 score less than 7 at the fifth-minute (blue line) and the difference is statistically significant at  $p < 0.05$ . On  
300 log-rank test as shown on Fig 5-C, babies with low birth weight (blue line) has higher survival than those  
301 with normal (red) and high birth weight (green line). According to this study the median time to death  
302 among neonates with stage-III HIE is much shorter 5 days (95% CI: 2.95-7.05) or they have a shorter  
303 survival time as compared to the overall median survival time (20days). This difference was statistically  
304 significant at p-value  $< 0.0001$  (Fig 5-D).

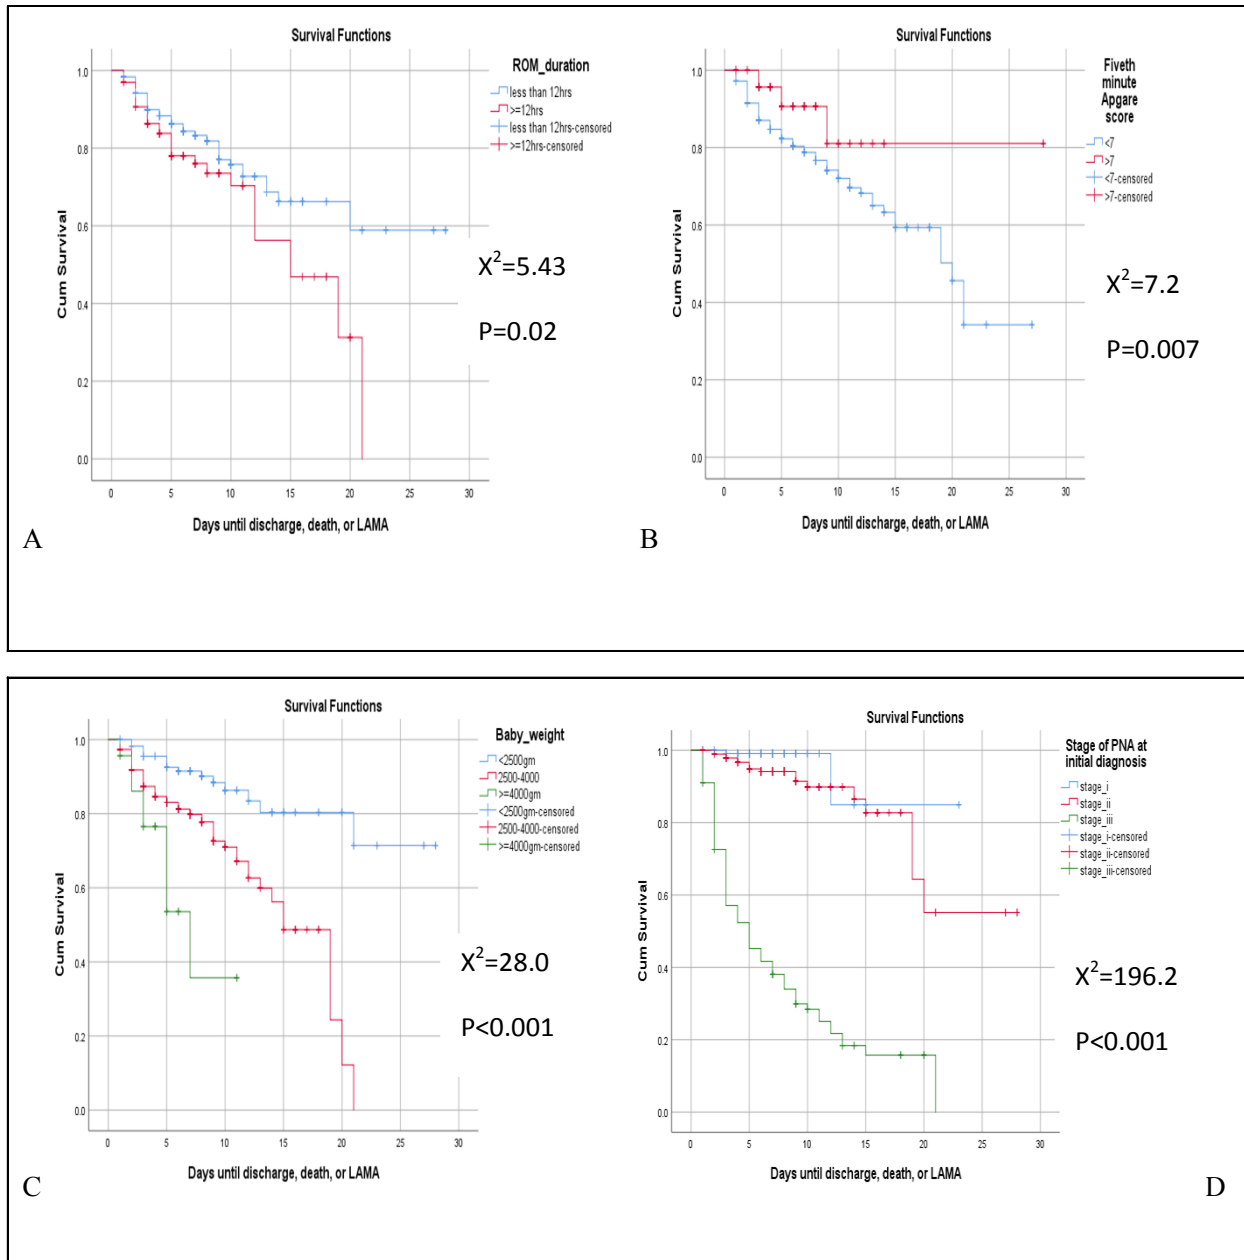

305

306 **Fig 5. The KM survival curves that compare time to death with different categories of (A) ROM**  
 307 **duration, (B) fifth-minute Apgar score, (C) birth weight, and (D) stage of HIE at admission among**  
 308 **asphyxiated babies who were admitted to NICU of WSUCSH**

309 **Predictors of time to death among asphyxiated neonates**

310 The relationship between the independent and outcome variables was analyzed using Weibull  
 311 proportional hazard regression model. According to this study, on multi-variable Weibull regression  
 312 analysis, the predictors of time to death among asphyxiated neonates at  $p<0.05$  were: 5<sup>th</sup>-minute Apgar  
 313 score greater than seven, birth weight greater than 4000gm, meconium stained amniotic fluid during

314 delivery, oxygen saturation level at admission, oxygen administration with Continuous Positive Airway  
315 Pressure (CPAP), resuscitation with chest compression, and need for anticonvulsant.

316 Keeping other variables constant, neonates who were delivered with meconium stained amniotic fluid  
317 were 14 times more likely to die (AHR=14.40; 95%CI:3.02-68.57) compared with those who delivered  
318 with clear amniotic fluid. Neonates with a fifth-minute Apgar score of less than 7 has 3.4 times higher  
319 hazard of death (AHR=3.42; 95%CI: 1.43-8.18) compared to those with a normal Apgar score. Similarly,  
320 neonates with high birth weight (BW>4000gms) are 4.7 times more likely to die faster (AHR=4.74;  
321 95%CI: 1.53-14.71) than those with normal birth weight. At any point in time throughout the follow-up  
322 period, a unite increase in the admission oxygen saturation level results in a 5% decrease in the hazard of  
323 death due to PNA (AHR=0.95; 95%CI: 0.93-0.97). Three management related variables, namely;  
324 treatment with anticonvulsants, method of oxygen administration, and resuscitation method were  
325 significant predictors of time to death after PNA in the study. Accordingly, neonates who were treated  
326 with anticonvulsant have 6 times higher hazard of death (AHR=6.44; 95%CI: 1.41-29.41) as compared  
327 with those who didn't needed treatment with anticonvulsant. Neonates who took oxygen through CPAP  
328 are 2.7 times more likely to die (AHR=2.790; 95%CI; 1.19-6.53) compared to those who took direct  
329 oxygen. Moreover, neonates who needed chest compression during resuscitation are 5 times more likely  
330 to die than those who were resuscitated using bag and mask only (AHR=5.09; 95%CI: 2.34-11.06)  
331 **(Table 5).**

332

333

334

335

336

337

338

339

340

341 Table 5 Bi-variable and Multi-variable Weibull regression analysis for the predictors of the time  
 342 to death among neonates who were admitted with PNA at WSUCSH; Southern Ethiopia, 2024

| Covariates                                                                                    | CHR (95%CI)         | AHR (95% CI)      | P- value      |
|-----------------------------------------------------------------------------------------------|---------------------|-------------------|---------------|
| ROM duration (Ref. less than 12hrs)                                                           |                     |                   |               |
| Greater than 12 hours                                                                         | 1.69(1.09-2.62)     | 0.57(0.22-1.48)   | 0.254         |
| Condition of amniotic fluid during delivery (Ref. Clear)                                      |                     |                   |               |
| MSAF                                                                                          | 7.85(2.86-21.50)    | 14.40(3.02-68.57) | <b>0.001*</b> |
| Mode of delivery (Ref. Spontaneous vertex delivery (SVD))                                     |                     |                   |               |
| Cesarean section                                                                              | 1.71(1.08- 2.70)    | 0.70 (0.30-1.60)  | 0.403         |
| Instrumental and assisted breech delivery                                                     | 1.06(0.57- 1.9)     | 1.37 (0.50- 3.71) | 0.532         |
| Apgar score-5 <sup>th</sup> minute (Ref. Greater than 7)                                      |                     |                   |               |
| Less than 7                                                                                   | 2.478(1.24- 4.95)   | 3.42(1.43-8.18)   | <b>0.006*</b> |
| Birth weight in grams (Ref. 2500-3999)                                                        |                     |                   |               |
| Less than 2500                                                                                | 0.30(.17- .53)      | 0.34(.13-.91)     | 0.053         |
| >= 4000                                                                                       | 2.64(1.31-5.35)     | 4.74(1.53-14.71)  | <b>0.007*</b> |
| Pulse rate at admission                                                                       | 0.99(.98-1.00)      | 1.00(.99-1.02)    | 0.098         |
| Temperature level at admission                                                                | 0.65(.53-.79)       | 1.16(.87-1.56)    | 0.301         |
| Oxygen saturation level at admission                                                          | 0.913(.89- .93)     | 0.95(0.93-0.97)   | <b>0.005*</b> |
| RBS level at admission                                                                        | 0.99(.98-1.00)      | 1.00(.99-1.00)    | 0.733         |
| Medical complications that occurred during hospital stay/ Acute kidney injury (AKI) (Ref. No) |                     |                   |               |
| Yes                                                                                           | 1.798(1.13- 2.87)   | .93(.39-2.22)     | 0.881         |
| Medical complications that occurred during hospital stay/ seizure (Ref. No)                   |                     |                   |               |
| Yes                                                                                           | 2.656(1.724- 4.094) | 1.05(.56-1.98)    | 0.869         |
| Was the baby given anticonvulsant? (Ref. No)                                                  |                     |                   |               |
| Yes                                                                                           | 6.84(2.96- 15.78)   | 6.44 (1.41-29.41) | <b>0.016*</b> |
| Oropharyngeal suctioning done? (Ref. NO)                                                      |                     |                   |               |
| Yes                                                                                           | 4.98(1.82-13.60)    | .35(.06-2.09)     | 0.255         |

| Method of oxygen administration (Ref. Direct method) |                   |                   |               |
|------------------------------------------------------|-------------------|-------------------|---------------|
| CPAP                                                 | 7.83(4.61- 13.32) | 2.790 (1.19-6.53) | <b>0.018*</b> |
| Method of resuscitation (Ref. Bag and mask only)     |                   |                   |               |
| Chest compression                                    | 4.73(2.97- 7.54)  | 5.09(2.34-11.06)  | <b>0.000*</b> |
| Intubation and adrenalin                             | 3.90(2.15- 7.09)  | 1.22(.46-3.22)    | 0.679         |

*\*statistically significant association ( $p < 0.05$ )*

*AHR=adjusted hazard ratio, CHR=crude hazard ratio, CI= confidence interval, ROM=rupture of membrane, MSAF=meconium Stained Amniotic Fluid, CPAP=continuous positive airway pressure*

343

## 344 Discussion

345 This retrospective follow-up study determined the time to death and identified its predictors among 404  
346 asphyxiated neonates admitted to the NICU at WSUCSH. Among these neonates, 22% (89) died during  
347 the follow-up period. The incidence density of mortality due to PNA in our study was 30.8 per 1000  
348 person days (95%CI: 25.0-37.9), which is comparable to findings from other tertiary hospitals in Ethiopia  
349 (Jimma: 29/1000 (95% CI: 23.20-36.01), Addis Ababa: 32/1000, and West Oromia: 38.86/1000 (95% CI:  
350 33.85–44.60)) [19, 20, 24]. These similarities highlight the significant burden of PNA-related mortality  
351 across the country. While variations in sample size and study period might explain slight differences in  
352 incidence density, our findings suggest a persistent challenge. Furthermore, considering the national  
353 neonatal mortality rate of 33 per 1000 live births reported in the 2019 mini-EDHS [15], our institutional  
354 data might underestimate the true national picture. Therefore, a large-scale national study is crucial to  
355 obtain a more comprehensive understanding of PNA-related mortality in Ethiopia.

356 The incidence of mortality due to PNA in our study (30.8 per 1000 person days) falls between the  
357 findings reported from other regions in Ethiopia. Compared to studies in Dessie (53/1000) and North-  
358 West Ethiopia (53.49/1000) [18, 26], our results suggest a potentially lower mortality burden. This  
359 difference might be attributed to variations in study setting and resources: Our study was conducted at  
360 WSUCSH, a tertiary hospital with potentially better access to human resources and advanced equipment  
361 compared to the facilities in the aforementioned studies. The other reason might be due to variations in  
362 temporal trends in treatment: Our data spans five years (more recent than the three-year periods in the  
363 compared studies). This might reflect improvements in neonatal care practices over time.

364 However, our findings also show a higher mortality rate compared to studies in South-West Ethiopia  
365 (9.1/1000) and Nigeria (12.8/1000) [25, 27]. Here, two potential explanations can be given: the first  
366 explanation is difference in study design and data Source: Our retrospective design utilizing medical  
367 records might overestimated mortality compared to the prospective cohort studies used in the other  
368 studies, which likely followed patients more closely. The second explanation is difference in study setting  
369 and population characteristics: The South-West Ethiopian study involved multiple facilities, potentially  
370 representing a broader population with varying risk factors. Additionally, geographical and  
371 sociodemographic differences, including healthcare access and utilization, might contribute to the  
372 observed discrepancy with the Nigerian study. Therefore, a prospective cohort study should be done in  
373 the current study facility to have a better picture of the incidence of mortality due to PNA and for a better  
374 comparison with other studies.

375 The median time to death in our study was 20 days, similar to the findings from Jimma (20 days) [20].  
376 However, this is somewhat longer than the median survival times reported in West Oromia and North  
377 West Ethiopia (15 days) [24, 26]. A more striking difference emerges when compared to studies in  
378 Dessie and South West Ethiopia, which documented a median time to death of only 8 days [18, 25].  
379 Several potential explanations for this variation warrant further investigation. These might include study  
380 design difference, as the study conducted in South West Ethiopia is a prospective cohort and followed the  
381 actual patients. Even though, the study conducted in Dessie is a retrospective cohort, there might be  
382 differences in the characteristics of the study population, differences in the severity of asphyxia at  
383 presentation and variations in treatment protocols. Additionally, slight variations in how time to death  
384 was defined or ascertained in different studies might play a significant role; for example, in the South  
385 West Ethiopian study they used the KM failure curve to report the median time to death. The  
386 retrospective nature of our study also limits our ability to definitively pinpoint the reasons for this  
387 variation. Future multicenter studies with standardized data collection methods are needed to explore the  
388 factors influencing survival time after PNA and to understand the observed differences between different  
389 facilities across the country in median time to death.

390 Our study identified the presence of meconium-stained amniotic fluid (MSAF) during delivery as a  
391 significant predictor of time to death from PNA. Newborns delivered with MSAF were 14 times more  
392 likely to die (AHR = 14.40; 95% CI: 3.02-68.57) compared to those delivered with clear fluid. This  
393 increased mortality risk is likely due to the association between MSAF and adverse birth outcomes,  
394 including perinatal asphyxia, neonatal sepsis, and meconium aspiration syndrome (MAS) [28]. A study in  
395 Northwest Ethiopia supports this finding, reporting a higher incidence of perinatal asphyxia among  
396 newborns born with MSAF (13.8%) compared to those without (7.6%) [26]. These findings highlight the

397 importance of heightened awareness among labor and delivery staff regarding the potential complications  
398 associated with MSAF. Prompt delivery and coordinated resuscitation strategies should be implemented  
399 upon MSAF diagnosis to minimize the risk of PNA-associated neonatal mortality.

400 Our analysis revealed that neonates with a low fifth-minute Apgar score (less than 7) were 3.4 times more  
401 likely to die (AHR= 3.42; 95% CI: 1.43-8.18) compared to those with a normal score. This finding aligns  
402 with research conducted in West Oromia [24], highlighting the established link between low Apgar scores  
403 and adverse outcomes. As a critical indicator of a newborn's immediate condition and potential for  
404 perinatal asphyxia, it also plays a vital role in guiding resuscitation efforts [29]. Furthermore, large-scale  
405 studies have documented the association between low Apgar scores and long-term health risks, including  
406 cardiovascular diseases and childhood mortality [30]. Early and effective resuscitation protocols, tailored  
407 to the severity of the Apgar score, are crucial to improve outcomes for neonates experiencing birth  
408 asphyxia.

409 Our study revealed a significant association between high birth weight (macrosomia, >4000 grams) and a  
410 4.7-fold increased hazard of death from PNA (AHR=4.74; 95% CI: 1.53-14.71). This finding aligns with  
411 research conducted in Dessie and Addis Ababa [18, 19], highlighting the potential risks associated with  
412 macrosomia. A large European study further supports this link, demonstrating a 4-fold increase in  
413 perinatal asphyxia risk among macrosomic babies compared to those with normal birth weight [31].  
414 These observations emphasize the need for increased vigilance and potentially modified delivery  
415 strategies for pregnancies identified as high-risk for macrosomia. Early identification and close  
416 monitoring of these pregnancies may allow for interventions to optimize fetal well-being and potentially  
417 reduce the risk of PNA and associated mortality.

418 Our study found that a one-unit increase in admission oxygen saturation was associated with a 5%  
419 decrease in the hazard of death from PNA (AHR= 0.95; 95% CI: 0.93-0.98). This aligns with research  
420 from Southeast Nigeria [27], highlighting the critical role of adequate oxygenation in improving outcomes  
421 for neonates with PNA. The link between oxygen saturation and mortality risk is further supported by a  
422 study in Northwest Ethiopia, which reported a significantly higher hazard of death among neonates with  
423 lower oxygen saturation levels [26]. These findings underscore the importance of prompt oxygen therapy  
424 and close monitoring of oxygen saturation for asphyxiated neonates to prevent hypoxia and its detrimental  
425 consequences, such as hypoxic encephalopathy.

426 Our study identified several key management practices that significantly influence time to death after  
427 PNA. These include treatment with anticonvulsants, oxygen administration method, and resuscitation  
428 technique. Neonates receiving anticonvulsants had a 6-fold increased hazard of death (AHR = 6.44; 95%

429 CI: 1.41-29.41) compared to those who did not. This association likely reflects the underlying severity of  
430 their condition, as anticonvulsants are typically used for neonates with seizures or severe PNA (HIE stage  
431 II and III), conditions known to be major mortality predictors [18, 19, 22]. These findings highlight the  
432 importance of accurate diagnosis and targeted treatment strategies for PNA patients.

433 Furthermore, the method of oxygen administration impacted mortality risk. Neonates receiving oxygen  
434 via CPAP were 2.7 times more likely to die (AHR = 2.790; 95% CI: 1.19-6.53) compared to those  
435 receiving direct oxygen. Similarly, neonates requiring chest compressions during resuscitation had a 5-  
436 fold increased risk of death (AHR = 5.09; 95% CI: 2.34-11.06) compared to those resuscitated with bag-  
437 and-mask only. These observations emphasize the crucial role of timely and appropriate respiratory  
438 support and resuscitation techniques tailored to the severity of the neonate's condition. Successful  
439 neonatal resuscitation efforts depend on critical actions that must occur in rapid succession; hence, the  
440 availability of resuscitation equipment, drugs, and experienced personnel are critical to maximize the  
441 chances of survival [32]. Investing in equipping neonatal units with essential resuscitation equipment and  
442 ensuring the availability of skilled personnel are critical steps to improve outcomes for asphyxiated  
443 neonates. A study in Ethiopia revealed that only half of healthcare facilities were adequately equipped for  
444 neonatal resuscitation [33]. Addressing these resource limitations is essential to optimize survival rates.

## 445 **Limitations of the study**

446 This study has some limitations inherent to its facility based retrospective design using secondary data  
447 sources. Missing maternal data on socioeconomic factors (educational status, occupation, etc.) could  
448 potentially influence neonatal mortality but were unavailable from medical records. Additionally, the  
449 study design limited our control over the quality of some measurements and classifications. For example,  
450 we relied on physician-assigned stages of PNA/HIE, which might introduce misclassification bias.  
451 Generalizability of the findings is limited due to the study's facility-based nature. The results may not be  
452 directly applicable to facilities with less equipped NICUs, such as health centers and private clinics.  
453 Additionally, neonates who were delivered at home and not admitted to the hospital could not be included  
454 in the study, potentially biasing the sample towards more severe cases.

## 455 **Conclusion**

456 This study identified a high mortality rate and prolonged hospitalization times among neonates with  
457 perinatal asphyxia (PNA) admitted to the WSUCSH NICU. It also pinpointed factors influencing  
458 survival, including birth complications, high birth weight, low oxygen levels, and specific treatment



459 approaches. Based on these findings, the health facilities are recommended to implement PNA risk  
460 assessment protocols, standardized delivery and resuscitation protocols, and invest in essential equipment  
461 and staff training on resuscitation techniques. The ministry of health and various stakeholders are also  
462 recommended to collaborate to update national clinical guidelines based on these findings, and conduct a  
463 large-scale national study to gain a more precise picture of PNA-related mortality in Ethiopia.

## 464 **Acknowledgments**

465 The authors are grateful to the data collectors and supervisors for their dedication and hard work during  
466 the data collection period. We would also like to extend our appreciation to Wolaita Sodo University  
467 Comprehensive Specialized Hospital (WSUCSH) Chief Clinical Officer, Medical Record Room and  
468 Neonatal Intensive Care Unit (NICU) staff for their cooperation throughout the study process.

## 469 **References**

- 470 1. de Oliveira NRG, Teixeira GG, Fernandes KTMS, Avelar MM, Medeiros M, Formiga  
471 CKMR. Therapeutic hypothermia as a neuroprotective strategy in newborns with perinatal  
472 asphyxia-case report. *Front Rehabil Sci.* 2023 Apr 19;4:1132779. doi:  
473 10.3389/fresc.2023.1132779. PMID: 37152243; PMCID: PMC10154559.
- 474 2. World Health Organization (WHO), Guidelines on newborn resuscitation, 2012; Geneva.  
475 accessed from the internet on January 2024  
476 ([http://www.who.int/about/licensing/copyright\\_form/en/index.html](http://www.who.int/about/licensing/copyright_form/en/index.html)).
- 477 3. Hakobyan M, Dijkman KP, Laroche S, Naulaers G, Rijken M, Steiner K, van Straaten HLM,  
478 Swarte RMC, Ter Horst HJ, Zecic A, Zonnenberg IA, Groenendaal F. Outcome of Infants  
479 with Therapeutic Hypothermia after Perinatal Asphyxia and Early-Onset Sepsis.  
480 *Neonatology.* 2019;115(2):127-133.
- 481 4. Sugiura-Ogasawara M, Ebara T, Yamada Y, Shoji N, Matsuki T, Kano H, Kurihara T, Omori  
482 T, Tomizawa M, Miyata M, Kamijima M, Saitoh S., Japan Environment, Children's Study  
483 (JECS) Group. Adverse pregnancy and perinatal outcome in patients with recurrent  
484 pregnancy loss: Multiple imputation analyses with propensity score adjustment applied to a  
485 large-scale birth cohort of the Japan Environment and Children's Study. *Am J Reprod*  
486 *Immunol.* 2019 Jan;81(1):e13072.
- 487 5. Behrman RE, ed. Nelson Textbook of Pediatrics / Richard E. Behrman [and Three Others]  
488 Editors. Twenty-one edition. Elsevier; 2020.

- 489 6. Enweronu-Laryea CC, Andoh HD, Frimpong-Barfi A, Asenso-Boadi FM. Parental costs for  
490 in-patient neonatal services for perinatal asphyxia and low birth weight in Ghana. PLoS One.  
491 2018;13(10):e0204410.
- 492 7. Gillam-Krakauer M GJC. Birth Asphyxia. [Updated 2023 Aug 14]. In: StatPearls [Internet].  
493 Treasure Island (FL): StatPearls Publishing; accessed Jan-2024. Available from:  
494 <https://www.ncbi.nlm.nih.gov/books/NBK430782/>.
- 495 8. WHO. Newborn Mortality; WHO fact sheet Geneva: World Health Organization; 2022  
496 [Available from: [https://www.who.int/news-room/fact-sheets/detail/levels-and-trends-in-](https://www.who.int/news-room/fact-sheets/detail/levels-and-trends-in-child-mortality-report-2021)  
497 [child-mortality-report-2021](https://www.who.int/news-room/fact-sheets/detail/levels-and-trends-in-child-mortality-report-2021)].
- 498 9. WHO Newborn Mortality factsheet Geneva: WHO; 2022 [updated 28 January 2022; cited  
499 2023 August 18]. Available from: [https://www.who.int/news-room/fact-sheets/detail/levels-](https://www.who.int/news-room/fact-sheets/detail/levels-and-trends-in-child-mortality-report-2021)  
500 [and-trends-in-child-mortality-report-2021](https://www.who.int/news-room/fact-sheets/detail/levels-and-trends-in-child-mortality-report-2021).
- 501 10. (UN-IGME) UNI-AGfCMEU. Levels & Trends in Child Mortality. New York, NY: United  
502 Nations Children's Fund (2018).
- 503 11. Odd D, Heep A, Luyt K, Draycott T. Hypoxic-ischemic brain injury: Planned delivery before  
504 intrapartum events. J Neonatal Perinatal Med. 2017;10(4):347-353.
- 505 12. McGuire W. Perinatal asphyxia. BMJ Clin Evid. 2007;2007.
- 506 13. Hofmeyr GJ, Haws RA, Bergström S, Lee ACC, Okong P, Darmstadt GL, et al. Obstetric  
507 care in low-resource settings: What, who, and how to overcome challenges to scale up?  
508 International Journal of Gynecology & Obstetrics. 2009;107:S21-S45.
- 509 14. Wall SN, Lee AC, Carlo W, Goldenberg R, Niermeyer S, Darmstadt GL, et al., editors.  
510 Reducing intrapartum-related neonatal deaths in low-and middle-income countries—what  
511 works? Seminars in perinatology; 2010: Elsevier.
- 512 15. Ethiopian Public Health Institute (EPHI) [Ethiopia] and ICF. 2021. Ethiopia Mini  
513 Demographic and Health Survey 2019: Final Report. Rockville, Maryland, USA: EPHI and  
514 ICF.
- 515 16. Federal Democratic Republic of Ethiopia Ministry of Health. Health Sector Transformation  
516 Plan II: HSTP II, 2020/21-2024/25. Addis Ababa; 2021.
- 517 17. United Nations Children's Fund WHO, World Bank and United Nations. Levels & Trends in  
518 Child Mortality Report 2015. New York (NY), Geneva and Washington (DC). Available  
519 from: [http://www.unicef.org/publications/files/Sept\\_15pdf](http://www.unicef.org/publications/files/Sept_15pdf)
- 520 18. Yitayew YA, Yalew ZM. Survival status and predictors of mortality among asphyxiated  
521 neonates admitted to the NICU of Dessie comprehensive specialized hospital, Amhara region,  
522 Northeast Ethiopia. Plos one. 2022;17(12):e0279451.

- 523 19. Getaneh FB, sebsbie G, Adimasu M, Misganaw NM, Jember DA, Mihretie DB, et al.  
524 Survival and predictors of asphyxia among neonates admitted in neonatal intensive care units  
525 of public hospitals of Addis Ababa, Ethiopia, 2021: a retrospective follow-up study. *BMC*  
526 *Pediatrics*. 2022;22(1):262.
- 527 20. Lencho Kajela, Solomon Berhanu, Guta Kune et al. Time to death and its predictors among  
528 asphyxiated neonates admitted to Jimma University Medical Center, Ethiopia: a retrospective  
529 cohort study, 05 January 2023, PREPRINT (Version 1) available at Research Square  
530 [<https://doi.org/10.21203/rs.3.rs-2416790/v1>].
- 531 21. Belete Fenta K, Tsegaw Biyazin T, Aynalem Yetwale H, Kassa Kindie M, Emebet A,  
532 Esmelalem M, et al. Time to death and predictors of mortality among asphyxiated neonates in  
533 southwest Ethiopia, 2022: prospective cohort study. *BMJ Open*. 2024;14(1):e077943.
- 534 22. Dessu S, Dawit Z, Timerga A, Bafa M. Predictors of mortality among newborns admitted  
535 with perinatal asphyxia at public hospitals in Ethiopia: a prospective cohort study. *BMC*  
536 *Pediatrics*. 2021;21(1):304.
- 537 23. Schoenfeld DA. Sample-size formula for the proportional-hazards regression model.  
538 *Biometrics*. 1983 Jun;39(2):499-503. PMID: 6354290.
- 539 24. Daka DT, Wubneh CA, Alemu TG, Terefe B. Incidence and predictors of mortality among  
540 neonates admitted with perinatal asphyxia at west Oromia tertiary hospitals, Ethiopia, 2022.  
541 *BMC Pediatrics*. 2023;23(1):475.
- 542 25. Belete Fenta K, Tsegaw Biyazin T, Aynalem Yetwale H, Kassa Kindie M, Emebet A,  
543 Esmelalem M, et al. Time to death and predictors of mortality among asphyxiated neonates in  
544 southwest Ethiopia, 2022: prospective cohort study. *BMJ Open*. 2024;14(1):e077943.
- 545 26. Shibaaw AT, Belay GM, Desta BK, Shiferaw FW, Lakew AM. Incidence and Predictors of  
546 Mortality Among Neonates with Perinatal Asphyxia, Northwest Ethiopia, 2021: An  
547 Institution Based Retrospective Cohort Study. *Research Square*; 2021.
- 548 27. Ekwochi U, Asinobi NI, Osuorah CD, Ndu IK, Ifediora C, Amadi OF, et al. Incidence and  
549 predictors of mortality among newborns with perinatal asphyxia: a 4-year prospective study  
550 of newborns delivered in health care facilities in Enugu, South-East Nigeria. *Clinical*  
551 *Medicine Insights: Pediatrics*. 2017;11:1179556517746646.
- 552 28. Firdaus U, Ali SM, Sachdeva S. Maternal and neonatal factors associated with meconium  
553 stained amniotic fluid. *Current Pediatrics*. 2013;17(1).
- 554 29. Jain L. Severe Perinatal Asphyxia and Apgar Scores. *American Journal of Diseases of*  
555 *Children*. 1987;141(12):1253.

- 556 30. Razaz N, Norman M, Alfvén T, Cnattingius S. Low Apgar score and asphyxia complications  
557 at birth and risk of longer-term cardiovascular disease: a nationwide population-based study  
558 of term infants. *The Lancet Regional Health – Europe*. 2023;24.
- 559 31. Beta J, Khan N, Fiolna M, Khalil A, Ramadan G, Akolekar R. Maternal and neonatal  
560 complications of fetal macrosomia: cohort study. *Ultrasound in Obstetrics & Gynecology*.  
561 2019;54(3):319-25.
- 562 32. Aziz K, Lee HC, Escobedo MB, Hoover AV, Kamath-Rayne BD, Kapadia VS, et al. Part 5:  
563 Neonatal Resuscitation: 2020 American Heart Association Guidelines for Cardiopulmonary  
564 Resuscitation and Emergency Cardiovascular Care. *Circulation*. 2020;142(16\_suppl\_2):S524-  
565 S50.
- 566 33. Weldearegay HG, Abrha MW, Hilawe EH, Gebrekidan BA, Medhanyie AA. Quality of  
567 neonatal resuscitation in Ethiopia: implications for the survival of neonates. *BMC Pediatrics*.  
568 2020;20(1):129.

## 569 **Supporting information**

570 **[S1 Table.docx](#): Clinical and laboratory characteristics**

571 **[S2 Table.docx](#): Management related factors**

572 **[S3 File.docx](#): Data abstraction checklist**

573 **[S4 File.xls](#): Dataset**
